# Supplementary material
Source: publisher figshare collection journal article supplement (https://acs.figshare.com/ndownloader/files/4497427)
Supplement: Supplementary file 1 [file 4497427]

# Synthesis and Properties of Functionalized Oligo(arylene) Molecular Wires with Thiolated Termini: Competing Thiol-Au and Nitro-Au Assembly

Xianshun Zeng,<sup>§</sup> Changsheng Wang,<sup>§</sup> Andrei S. Batsanov,<sup>§</sup> Martin R. Bryce,<sup>\*,§</sup> Joanna Gigon,<sup>†</sup>

Barbara Urasinska-Wojcik,<sup>†</sup> Geoffrey J. Ashwell<sup>†</sup>

<sup>§</sup>*Department of Chemistry, Durham University, Durham DH1 3LE, UK;* <sup>†</sup>*The Nanomaterials Group, School of Chemistry, University of Wales, Bangor, Deiniol Street, Bangor, Gwynedd, UK LL55 2UW.*  
*m.r.bryce@durham.ac.uk*

## Contents

|              |                                                                                                          |
|--------------|----------------------------------------------------------------------------------------------------------|
| Page S1-S6   | Synthesis and characterization of compounds <b>5</b> , <b>9</b> , <b>14-17</b>                           |
| Page S6      | Procedures for self-assembly and electrical characterization                                             |
| Page S6      | Figure S3: XPS spectrum of a SAM of <b>11</b> prepared using NH <sub>4</sub> OH as a deprotecting agent. |
| Pages S7-S18 | Copies of <sup>1</sup> H and <sup>13</sup> C NMR spectra                                                 |
| Page S19     | Reference for the Supporting Information                                                                 |

**General.** Details of equipment and procedures for the synthetic chemistry are the same as reported previously.<sup>1</sup> XPS data were obtained using a Kratos AXIS Ultra spectrometer and a monochromatic Al K $\alpha$  X-ray source. The instrument was operated at pressures of  $<9 \times 10^{-7}$  Pa. Data were collected at step intervals of 0.05 eV and the core level spectra of monolayers on gold were referenced to the Au 4f peak at 84.0 eV.

**Compound 5.** To a solution of **4** (3.70 g, 6.40 mmol) in anhydrous THF (100 mL) at  $-78^\circ\text{C}$  *n*-BuLi (2.5 M in hexane, 3.0 mL, 7.5 mmol) was added dropwise. The reaction mixture

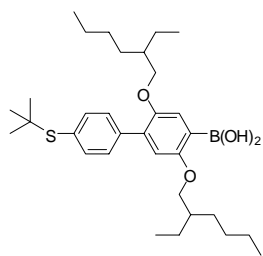

was stirred for 4 h at  $-78^\circ\text{C}$ , and then trimethylborate (5 mL, excess) was added. The mixture was stirred for a further 3 h at  $-78^\circ\text{C}$  and then slowly warmed to room temperature. The solvent was removed in vacuo and the residue was dissolved in dichloromethane (50 mL) and aqueous hydrochloric acid (1 M, 50 mL) and stirred for 1 h. The organic phase was separated and dried over  $\text{MgSO}_4$ .

The solvent was removed and the residue was purified by column chromatography (silica gel, eluent DCM: acetone, 100:3 v/v) to give **5** as a colorless oil (2.97 g, 86% yield).  $^1\text{H}$  NMR (400 MHz,  $\text{CDCl}_3$ )  $\delta$  7.56 (d,  $J = 8.4$  Hz, 2H), 7.51 (d,  $J = 8.4$  Hz, 2H), 7.45 (s, 1H), 6.91 (s, 1H), 6.31 [bs, 2H,  $\text{B}(\text{OH})_2$ ], 3.98 (d,  $J = 5.6$  Hz, 2H), 3.85 (d,  $J = 5.2$  Hz, 2H), 1.89-1.75 (m, 1H), 1.62-1.56 (m, 1H), 1.54-1.19 (m, 25H), 0.98-0.79 (m, 12H);  $^{13}\text{C}$  NMR (100 MHz,  $\text{CDCl}_3$ )  $\delta$  158.6, 150.6, 139.0, 137.0, 134.45, 131.6, 129.7, 120.5, 113.5, 71.7, 71.5, 46.1, 39.8, 31.1, 30.9, 30.7, 29.2, 29.1, 24.1, 24.3, 23.1, 23.1, 14.2, 11.3. Anal. Calcd for  $\text{C}_{32}\text{H}_{51}\text{BO}_4\text{S}$ : C, 70.83; H, 9.47. Found: C, 70.88; H, 9.46.

**Compound 9.** A mixture of **7** (0.428 g, 1.0 mmol), **8** (0.412 g, 2.2 mmol),  $\text{Pd}[\text{PPh}_3]_4$  (80 mg), CuI (20 mg), dry THF (50 mL) and triethylamine (5 mL) was stirred at room

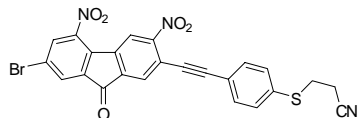

temperature for 12 h and then at  $80^\circ\text{C}$  for an additional 2 h to afford a dark orange solution. The solvent was removed by vacuum evaporation and the residue was boiled with ethanol (50 mL). The mixture was suction filtered to collect a dark yellow solid, which was chromatographed on a silica column eluted with DCM. The first fraction from the column was crystallized from chlorobenzene to yield **9** as orange needles (0.33 g, 62% yield).  $^1\text{H}$  NMR (500 MHz,  $\text{DMSO}-d_6$ , 363K)  $\delta$  8.54 (s, 1H), 8.47 (d,  $J = 1.5$  Hz, 1H); 8.18 (d,  $J = 1.5$  Hz, 1H), 8.06 (s, 1H), 7.55 (d,  $J = 8.1$  Hz, 2H), 7.47 (d,  $J = 8.3$  Hz, 2H), 3.33 (t,  $J = 6.8$  Hz, 2H), 2.86 (t,  $J = 6.8$  Hz, 2H);  $^{13}\text{C}$  NMR (125 Hz,  $\text{DMSO}-d_6$ , 363 K)  $\delta$  186.4, 152.5, 144.3, 138.4, 137.7, 136.8, 135.7, 132.7, 132.5, 131.9, 131.1, 128.8, 127.9, 123.4, 121.2, 119.5, 118.10, 118.06, 99.5, 84.4, 27.4, 17.1. Anal. Calcd for  $\text{C}_{24}\text{H}_{12}\text{BrN}_3\text{O}_5\text{S}$ : C, 53.95; H, 2.26; N, 7.86. Found: C, 53.77; H, 2.19; N, 7.82.

A single crystal for X-ray structural analysis was obtained by slow evaporation of a 1,4-dioxane solution of **9**. *Crystal data*:  $C_{24}H_{12}BrN_3O_5 \cdot \frac{1}{2}C_4H_8O_2$ ,  $M=578.39$ ,  $T=120$  K, triclinic, space group  $P\bar{1}$  (No. 2),  $a=7.7250(6)$ ,  $b=8.3461(5)$ ,  $c=19.3085(18)$  Å,  $\alpha=79.088(12)$ ,  $\beta=82.355(12)$ ,  $\gamma=75.344(14)^\circ$ ,  $U=1177.84(16)$  Å<sup>3</sup>,  $Z=2$ ,  $\mu=1.88$  mm<sup>-1</sup>, Mo- $K_\alpha$  radiation ( $\lambda=0.71073$  Å), Bruker SMART 6K CCD area detector and SHELXTL 6.14 software, absorption correction by numerical integration, 18461 reflections with  $20 \leq 55^\circ$ ,  $R_{int}=0.061$ ,  $R(F)=0.033$  [4075 data with  $I \geq 2\sigma(I)$ ],  $wR(F^2)=0.069$  [all 5403 unique data]. CCDC-706327. The molecular structure is shown in Figure S1.

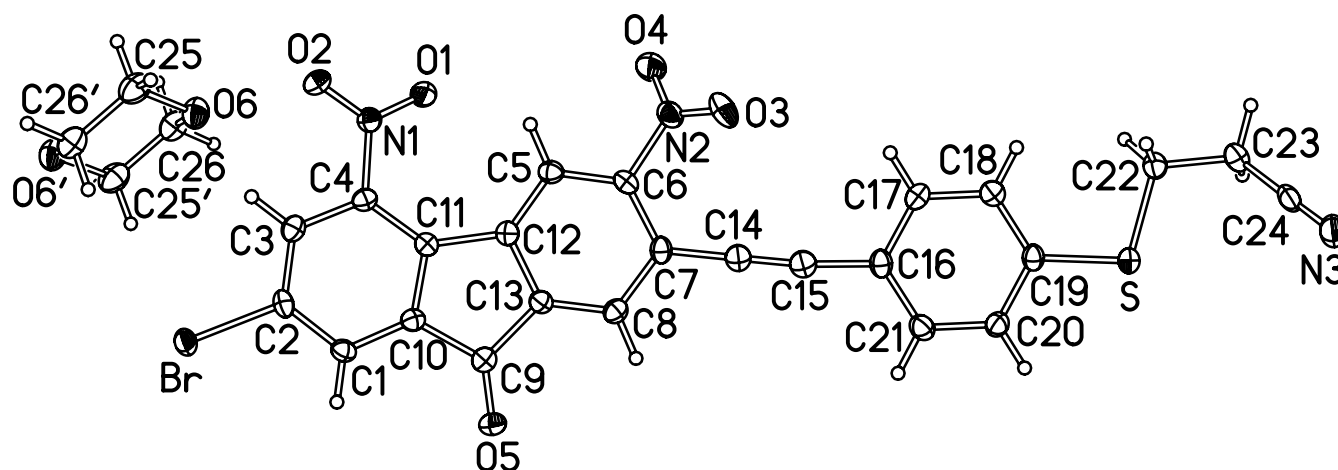

**Figure S1.** X-ray molecular structure of  $9 \cdot \frac{1}{2} C_4H_8O_2$ . Thermal ellipsoids are shown at the 50% probability level. The dioxane molecule lies at a crystallographic inversion centre.

**Compound 12.** To a mixture of 2,7-dibromo-3,5-dinitrofluorenone **7** (64 mg, 0.15 mmol), boronic acid **5** (163 mg, 0.3 mmol), THF (7 mL), toluene (7 mL) and aqueous sodium carbonate (1 M, 1.0 mL, 1.0 mmol),  $Pd(PPh_3)_4$  (12.5 mg, 0.01 mmol) was added in one

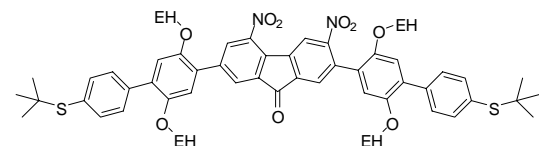

portion, and the mixture was heated at reflux for 24 h. The solvent was removed under reduced pressure and the residue

was dissolved in dichloromethane (20 mL) and washed with water (10 mL). The separated red organic phase was dried over  $MgSO_4$ . The solvent was removed and the residue was purified by column chromatography ( $SiO_2$ , eluent DCM/petroleum ether 5:1 to 10:3 v/v) to give **12** as a red solid (145 mg, 76% yield); mp 68-69 °C. MALDI-ToF MS: 1262.8 ( $M^+$ ).  $^1H$  NMR (400 MHz,  $CDCl_3$ )  $\delta$  8.71 (s, 1H), 8.58 (d,  $J = 1.2$  Hz, 1H), 8.32 (d,  $J = 1.6$  Hz, 1H), 7.93 (s, 1H), 7.61-7.54 (m, 8H), 7.05 (s, 1H), 7.04 (s, 1H), 6.98 (s, 1H), 6.93 (s, 1H), 3.97-3.77 (m, 8H), 1.77-1.59 (m, 4H), 1.43-1.07 (m, 50H), 0.97-0.77 (m, 24H).  $^{13}C$  NMR (100 MHz,  $CDCl_3$ )  $\delta$  189.7, 153.9, 150.71, 150.66, 150.4, 149.6, 144.4, 142.0, 139.9, 138.5, 138.3, 137.0, 136.9, 136.6, 136.1, 135.9, 133.4, 132.7, 132.3, 131.8, 131.5, 129.9, 129.7, 129.56, 128.5, 125.9, 125.5, 121.9, 115.2, 114.8, 114.7, 114.1, 72.1, 72.0, 71.6, 46.1, 46.0, 39.7, 39.6, 39.2,

31.0, 30.7, 30.6, 30.5, 29.1, 29.0, 28.9, 24.03, 23.95, 23.8, 23.01, 22.97, 22.9, 14.03, 13.97, 11.2, 11.1. Anal. Calcd for  $C_{77}H_{102}N_2O_9S_2$ : C, 73.18; H, 8.14; N, 2.22. Found: C, 73.22; H, 8.18; N, 2.12.

**Compound 14.** To a mixture of **13** (226 mg, 0.50 mmol), **2** (210 mg, 1.0 mmol), THF (30 mL), toluene (30 mL) and aqueous sodium carbonate (1 M, 2.0 mL, 2 mmol),  $Pd(PPh_3)_4$  (23 mg, 0.02 mmol)

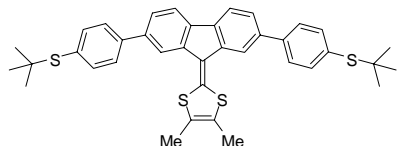

was added in one portion, and the mixture was heated at reflux for 24 h.

The solvent was removed under reduced pressure. The residue was dissolved in dichloromethane (40 mL) and washed with water (40 mL).

The red organic phase was separated and dried over  $MgSO_4$ , the solvent was removed and the residue was purified by column chromatography ( $SiO_2$ , eluent DCM) to give **14** as a yellow powder (185 mg, 59% yield); mp 323-324 °C. ES-MS: 622.3 ( $M^+$ ).  $^1H$  NMR (400 MHz,  $CDCl_3$ )  $\delta$  8.02 (d,  $J$  = 1.6 Hz), 7.90 (d,  $J$  = 7.6 Hz), 7.68 (d,  $J$  = 8.0 Hz, 4H), 7.63 (d,  $J$  = 8.0 Hz, 4H), 7.54 (dd, 2H,  $J$  = 8.0 and 1.6 Hz), 2.19 (s, 6H), 1.35 (s, 18H).  $^{13}C$  NMR (100 MHz,  $CDCl_3$ )  $\delta$  142.4, 139.1, 138.2, 137.8, 136.5, 131.5, 127.4, 124.1, 123.9, 121.5, 120.0, 46.1, 31.1, 13.2. Anal. Calcd for  $C_{38}H_{38}S_4$ : C, 73.26; H, 6.15. Found: C, 73.18; H, 6.24.

**Compound 15.** A mixture of **14** (106 mg, 0.165 mmol), dichloromethane (15 mL) and acetyl chloride

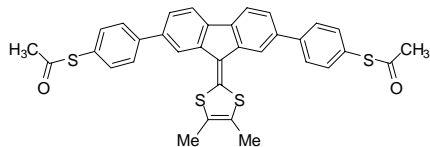

(4 mL) was cooled to 0 °C and then  $BBr_3$  (1.8 mL, 1.8 mmol) solution in dichloromethane (10 mL) was added in one portion. The procedure was the same as described for the preparation of **11**.

Column chromatography ( $SiO_2$ , eluent DCM) gave **15** as a yellow powder (78 mg, 78% yield); mp 303-304 °C (dec.). ES-MS: 594.2 ( $M^+$ ).  $^1H$  NMR (400 MHz,  $CDCl_3$ )  $\delta$  8.02 (s, 2H), 7.91 (d,  $J$  = 8.0 Hz, 2H), 7.77 (d,  $J$  = 8.4 Hz, 4H), 7.54-7.52 (m, 6H), 2.48 (s, 6H), 2.18 (s, 6H);  $^{13}C$  NMR (100 MHz,  $CDCl_3$ )  $\delta$  194.3, 143.4, 141.6, 139.0, 138.3, 136.6, 134.8, 128.3, 126.4, 124.1, 124.0, 121.7, 120.0, 118.12, 30.3, 13.2. Anal. Calcd for  $C_{34}H_{26}O_2S_4$ : C, 68.65; H, 4.41. Found: C, 68.68; H, 4.38.

**Compound 16.** To a mixture of **13** (151 mg, 0.30 mmol), **5** (398 mg, 0.71 mmol), THF (10 mL),

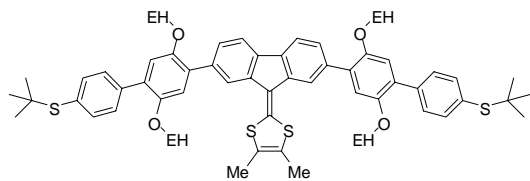

toluene (10 mL) and aqueous sodium carbonate (1 M, 20

mL, 2.0 mmol),  $Pd(PPh_3)_4$  (23 mg, 0.02 mmol) was added in

one portion, and then the mixture was heated at reflux for 48

h. The solvent was removed under reduced pressure and the

residue was dissolved in dichloromethane (20 mL) and washed with water (30 mL). The separated organic phase was dried over  $MgSO_4$ , evaporated and the residue was chromatographed ( $SiO_2$ , eluent DCM : acetone, 100:1 gradient to 100/3) to give **16** as a yellow crystalline solid (205 mg, 53% yield); mp 138-139 °C. MALDI-ToF MS: 1286.9 ( $M^+$ );  $^1H$  NMR (400 MHz,  $CDCl_3$ )  $\delta$  8.10 (dd,  $J$  = 1.6 and 0.4 Hz, 2H), 7.92 (dd,  $J$  = 8.0 Hz and 0.4 Hz, 2H), 7.61 (s, 8H), 7.57 (dd, 2H,  $J$  = 8.0 and 1.6 Hz), 7.17 (s,

2H), 7.07 (s, 2H), 3.88 (d, 4H,  $J = 5.6$  Hz), 3.85 (d,  $J = 5.6$  Hz, 4H), 2.18 (s, 6H), 1.71-1.62 (m, 4H), 1.42-1.18 (m, 42H), 0.90-0.77 (m, 24H);  $^{13}\text{C}$  NMR (100 MHz,  $\text{CDCl}_3$ )  $\delta$  149.8, 149.5, 138.5, 138.1, 136.5, 135.9, 135.3, 131.5, 130.0, 128.9, 128.7, 125.5, 123.1, 122.5, 117.9, 115.4, 115.2, 71.3, 71.0, 44.9, 38.7, 30.9, 30.0, 29.6, 28.7, 28.1, 28.0, 23.0, 22.9, 22.01, 21.97, 21.7, 13.1, 13.0, 12.1, 10.2. Anal. Calcd for  $\text{C}_{82}\text{H}_{110}\text{O}_4\text{S}_4$ : C, 76.46; H, 8.61. Found: C, 76.66; H, 8.66.

A single crystal for X-ray structural analysis was obtained by slow evaporation of a diethyl ether/DCM/ethanol solution of **16**. *Crystal data*:  $\text{C}_{82}\text{H}_{110}\text{O}_4\text{S}_4$ ,  $M = 1287.94$ ,  $T = 120$  K, monoclinic, space group  $C2/c$  (No. 15),  $a = 52.274(4)$ ,  $b = 8.3593(6)$ ,  $c = 39.186(3)$  Å,  $\beta = 118.24(1)^\circ$ ,  $U = 15085(2)$  Å<sup>3</sup>,  $Z = 8$ ,  $\mu = 0.17$  mm<sup>-1</sup>, Mo- $K_\alpha$  radiation ( $\lambda = 0.71073$  Å), Bruker SMART 6K CCD area detector and SHELXTL 6.14 software, absorption correction by numerical integration, 63511 reflections with  $2\theta \leq 50^\circ$ ,  $R_{\text{int}} = 0.138$ ,  $R(F) = 0.069$  [5250 data with  $I \geq 2\sigma(I)$ ],  $wR(F^2) = 0.220$  [all 13281 unique data]. CCDC-706328. The molecular structure is shown in Figure S2.

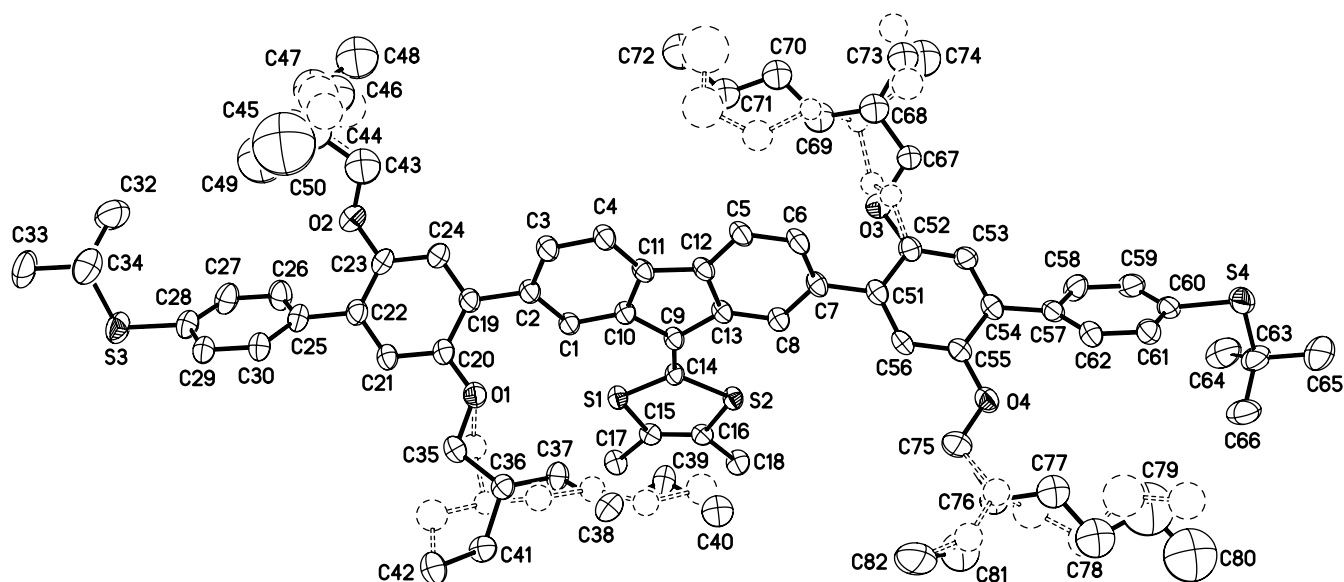

°C (dec.). MALDI-ToF MS: 810.2 ( $M^+$ ); 833.1 ( $M+Na^+$ ).  $^1H$  NMR (400 MHz, DMSO- $d_6$ )  $\delta$  9.24 (s, 2H), 9.19 (s, 2H), 8.12 (s, 2H), 8.07 (d,  $J = 8.0$  Hz, 2H), 7.72 (d,  $J = 8.4$  Hz), 7.58 (d,  $J = 8.0$  Hz, 2H), 7.51 (d,  $J = 8.4$  Hz, 4H), 7.07 (s, 2H), 6.99 (s, 2H), 2.51 (s, 6H), 2.27 (s, 6H);  $^{13}C$  NMR (100 MHz, DMSO- $d_6$ )  $\delta$  194.3, 147.6, 140.5, 140.1, 137.4, 137.0, 135.8, 134.5, 130.2, 129.1, 126.64, 126.57, 126.1, 124.5, 123.5, 120.0, 118.1, 117.8, 31.23, 13.3. Anal. Calcd for  $C_{46}H_{34}O_6S_4$ : C, 68.12; H, 4.23. Found: C, 68.22; H, 4.36.

**Self-assembly.** Monolayers were formed by immersing gold-coated substrates in a tetrahydrofuran solution of the wire molecule ( $0.1 \text{ mg mL}^{-1}$ ) to which aqueous ammonium hydroxide solution was added to facilitate removal of the protecting groups. The SAMs were then thoroughly rinsed with tetrahydrofuran to remove physisorbed material.

**Electrical characterization.** SAMs were investigated using a MultiMode scanning tunnelling microscope with a Nanoscope IV controller (Veeco Instruments, Cambridge). For  $I$ - $V$  characterization, the gold probe was landed at distinct surface features distant from grain boundaries. In each case, the SAMs were investigated at several locations across the surface and the  $I$ - $V$  data were averaged from multiple scans at each of these sites.

## XPS data

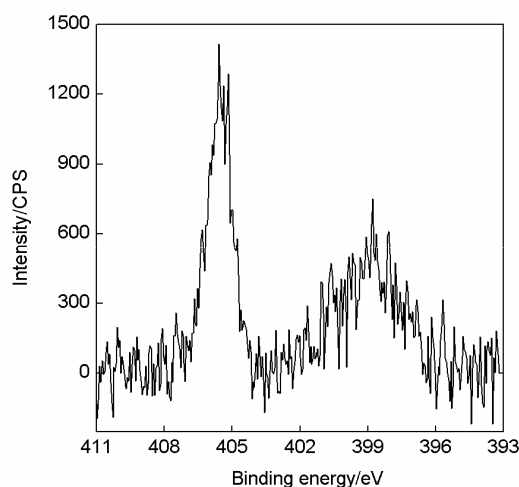

**Figure S3.** N 1s spectrum of a SAM of **11** showing the peak at 405.6 eV which is characteristic of  $NO_2$  and the anomalous lower energy peak, which was observed on some occasions when using  $NH_4OH$  as a deprotecting agent.

# Compound 2. <sup>1</sup>H NMR (400 MHz, CDCl<sub>3</sub>)

Bruker data converted from file /data/tempdat/28123939/10  
xz142

Pulse Sequence: zg30

Solvent: cdcl3

Temp: 24.2 C / 297.3 K

File: /28123939-10.cv

Experiment run on 01-28-06

Processed on "moodus"

Relax. delay 1.000 sec  
1st pulse 90.0 degrees  
2nd pulse 90.0 degrees  
Acq. time 7.899 sec  
Width 8278.1 Hz  
16 repetitions  
OBSERVE OFF, 400.1300146 MHz  
DATA PROCESSING  
FT size 65536

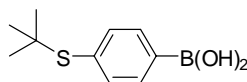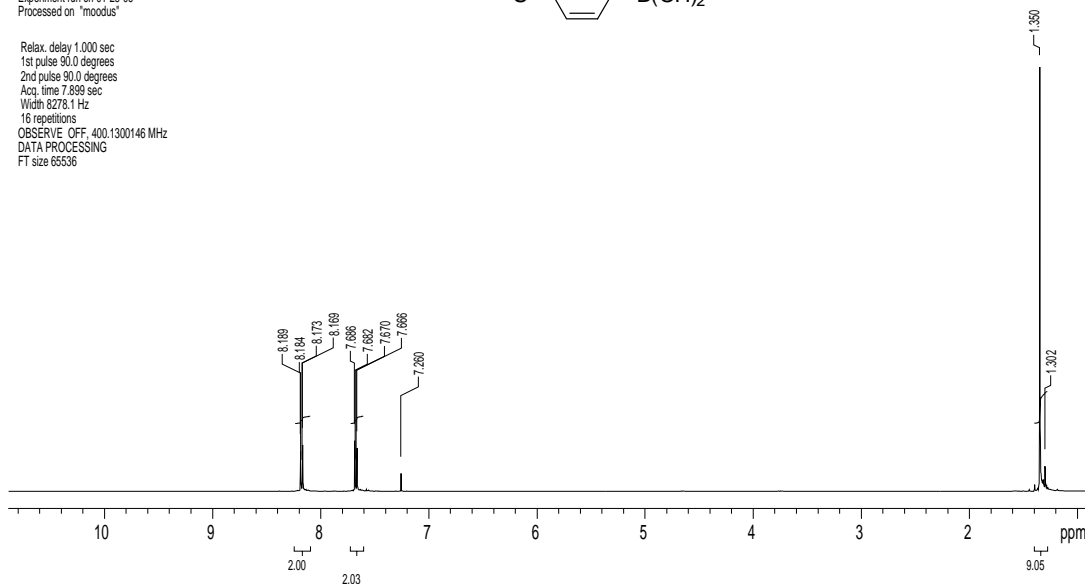

# Compound 2. <sup>13</sup>C NMR (100 MHz, CDCl<sub>3</sub>)

Bruker data converted from file /data/tempdat/28123939/11  
xz142

Pulse Sequence: zgpg30

Solvent: cdcl3

Temp: 26.2 C / 299.3 K

File: /28123939-11.cv

Experiment run on 01-28-06

Processed on "moodus"

Relax. delay 2.000 sec  
1st pulse 90.0 degrees  
2nd pulse 90.0 degrees  
Acq. time 2.728 sec  
Width 23980.8 Hz  
1024 repetitions  
OBSERVE OFF, 100.6127738 MHz  
DATA PROCESSING  
FT size 65536

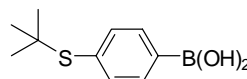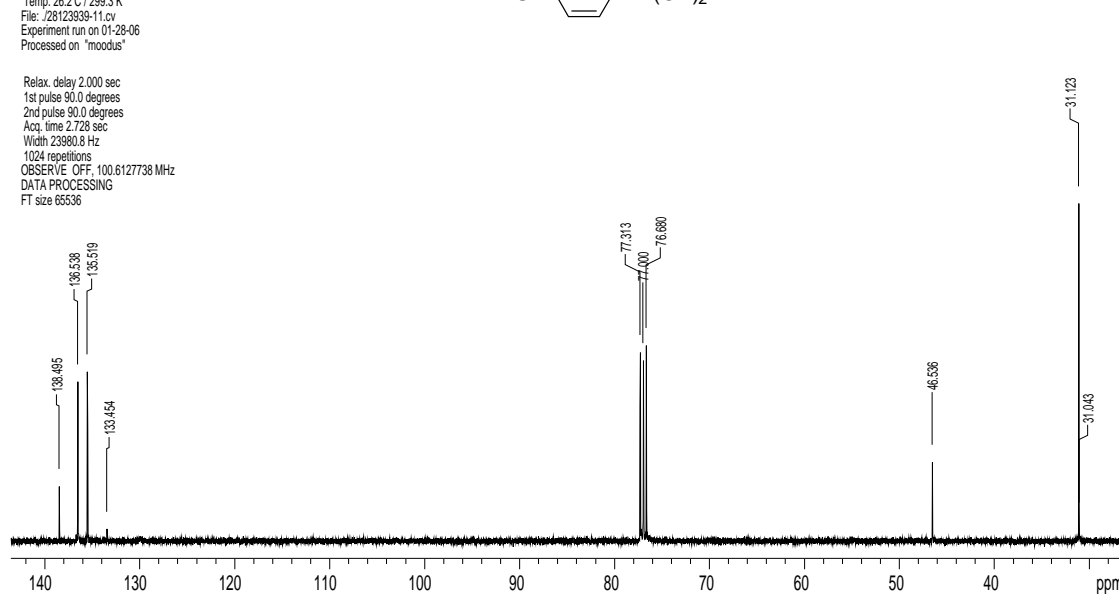

Compound **4**.  $^1\text{H}$  NMR (400 MHz,  $\text{CDCl}_3$ )

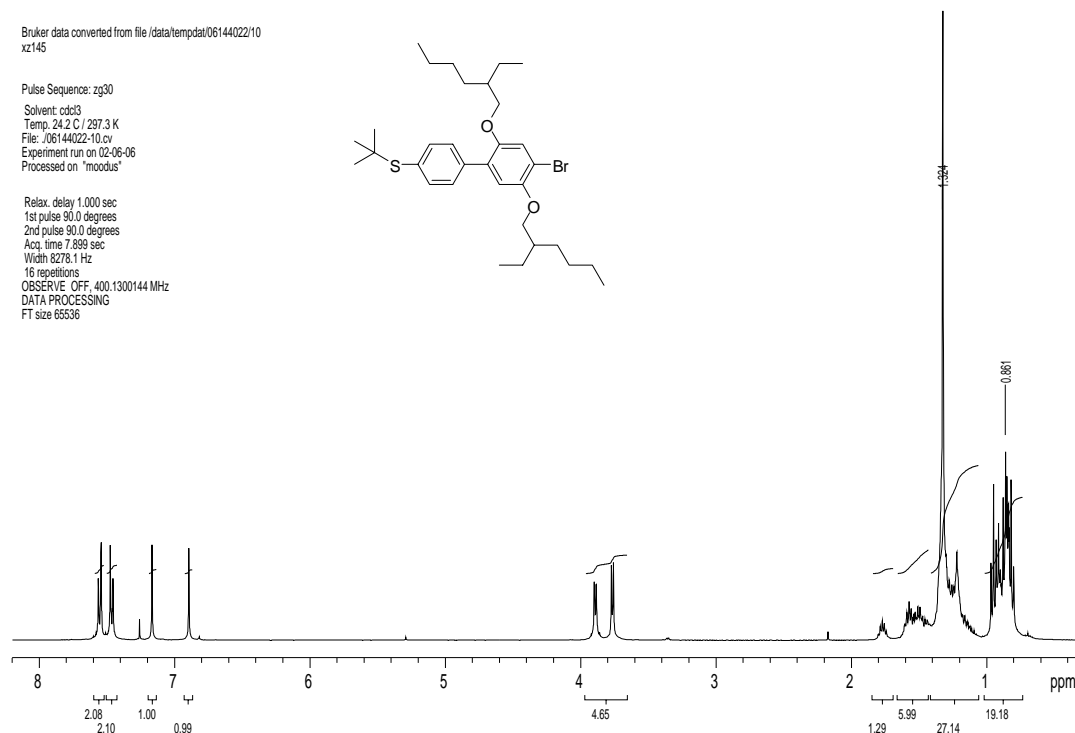

Compound **4**.  $^{13}\text{C}$  NMR (100 MHz,  $\text{CDCl}_3$ )

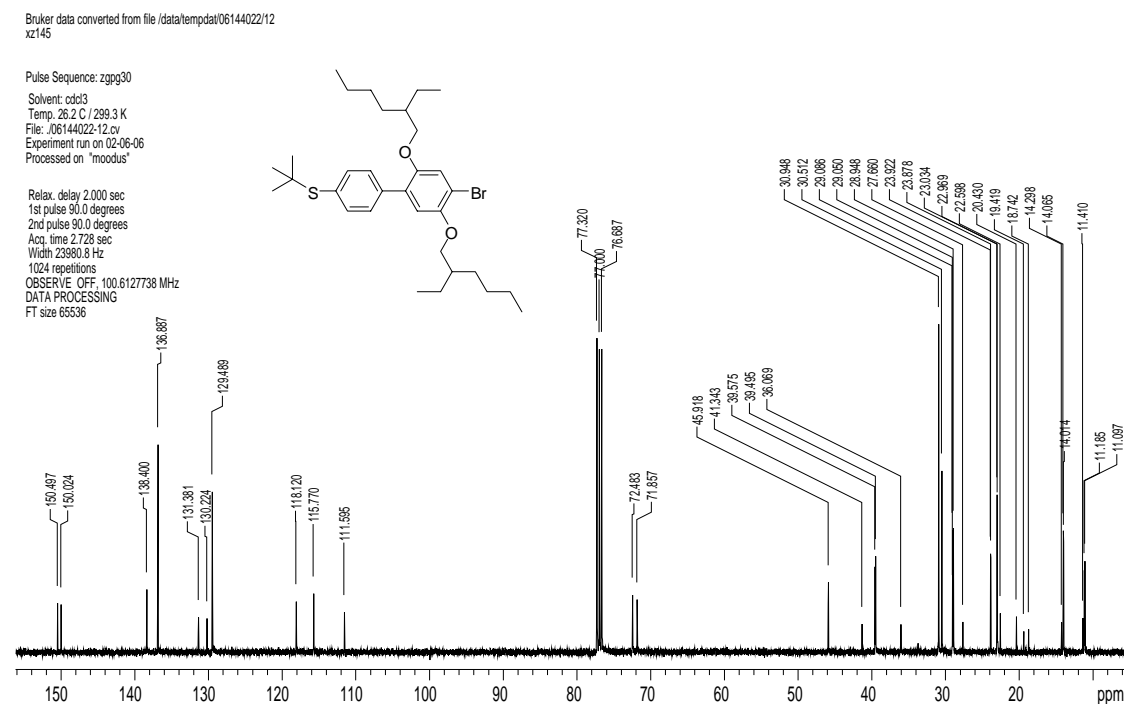



# Compound 5. $^1\text{H}$ NMR (400 MHz, $\text{CDCl}_3$ )

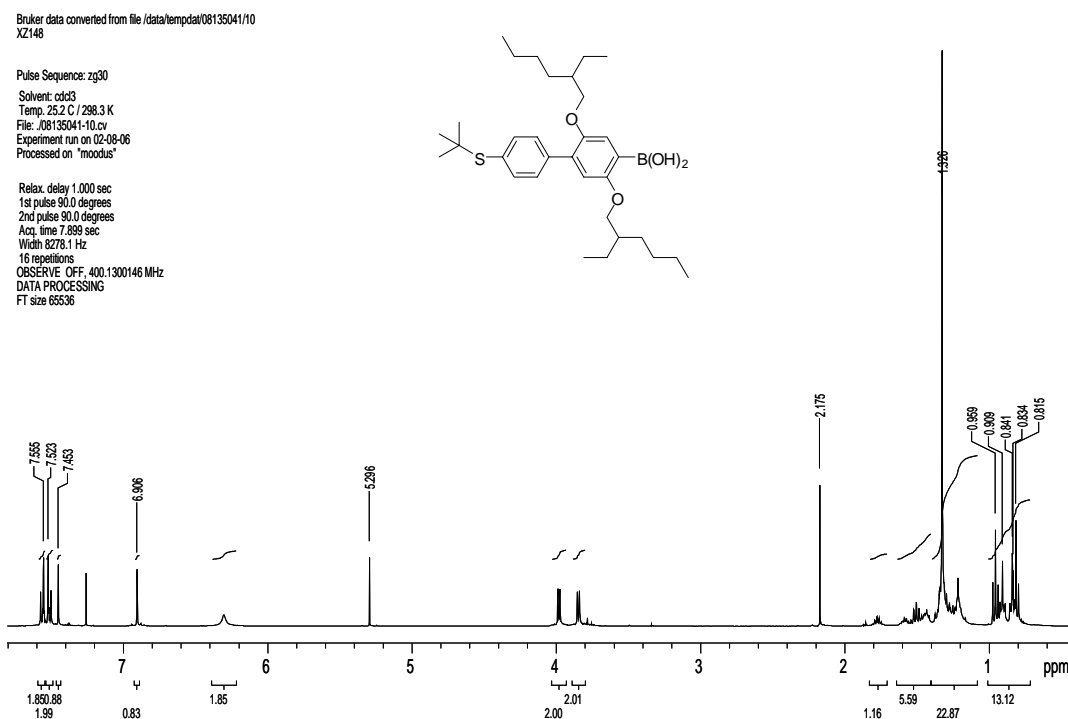

# Compound 5. $^{13}\text{C}$ NMR (100 MHz, $\text{CDCl}_3$ )

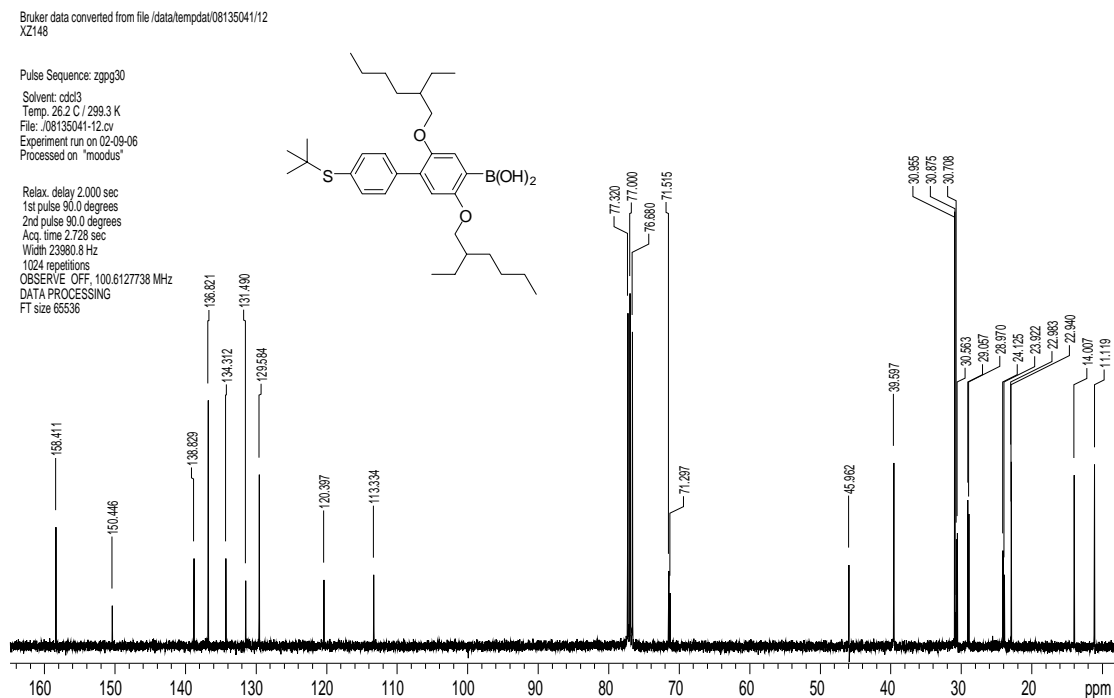

# Compound 7. <sup>1</sup>H NMR (200 MHz, DMSO-d<sub>6</sub>)

STANDARD 1H OBSERVE

Pulse Sequence: s2pul

Solvent: DMSO

Ambient temperature

File: tempdat24152803

Experiment run on Apr 24 2002

Processed on "moodus"

Relax. delay 1.000 sec

Pulse 30.0 degrees

Acq. time 3.004 sec

Width 3194.9 Hz

16 repetitions

OBSERVE H1, 199.9915720 MHz

DATA PROCESSING

Line broadening 0.3 Hz

FT size 32768

Total time 1 min, 4 sec

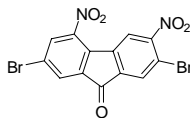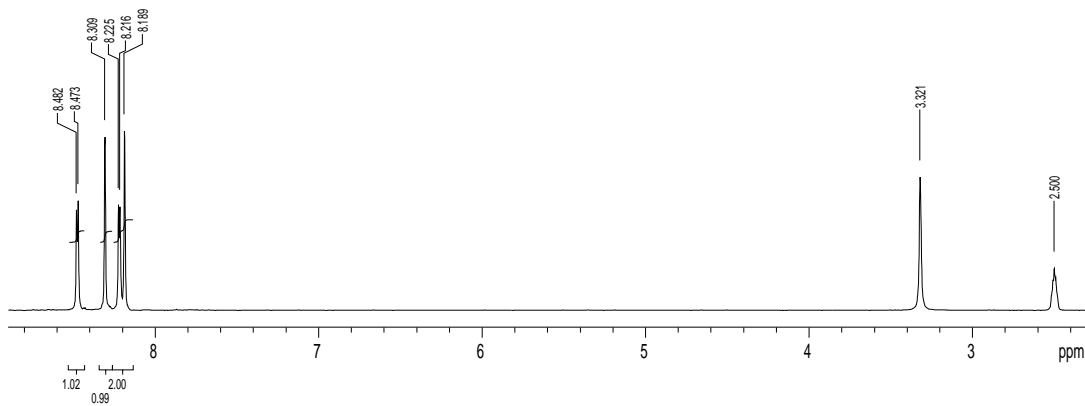

# Compound 7. <sup>13</sup>C NMR (100 MHz, DMSO-d<sub>6</sub>)

Bruker data converted from file /data/tempdat/02154433/10  
csw-342.3 (P2)

Pulse Sequence: zgpg30

Solvent: dmsd

Temp: 28.2 C / 301.3 K

File: /02154433-10.cv

Experiment run on 09-02-05

Processed on "moodus"

Relax. delay 2.000 sec

1st pulse 90.0 degrees

2nd pulse 90.0 degrees

Acq. time 2.728 sec

Width 23980.8 Hz

1024 repetitions

OBSERVE OFF, 100.6128240 MHz

DATA PROCESSING

FT size 65536

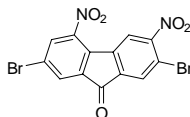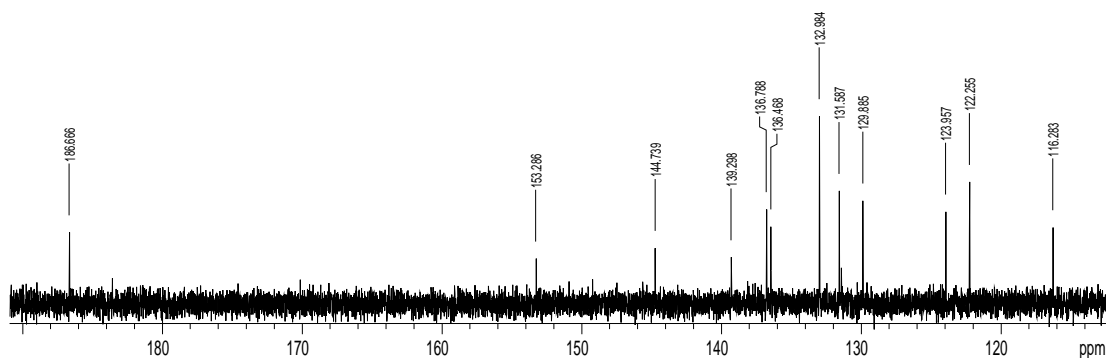

Compound **9**.  $^1\text{H}$  NMR (500 MHz, DMSO- $d_6$ , 363K)

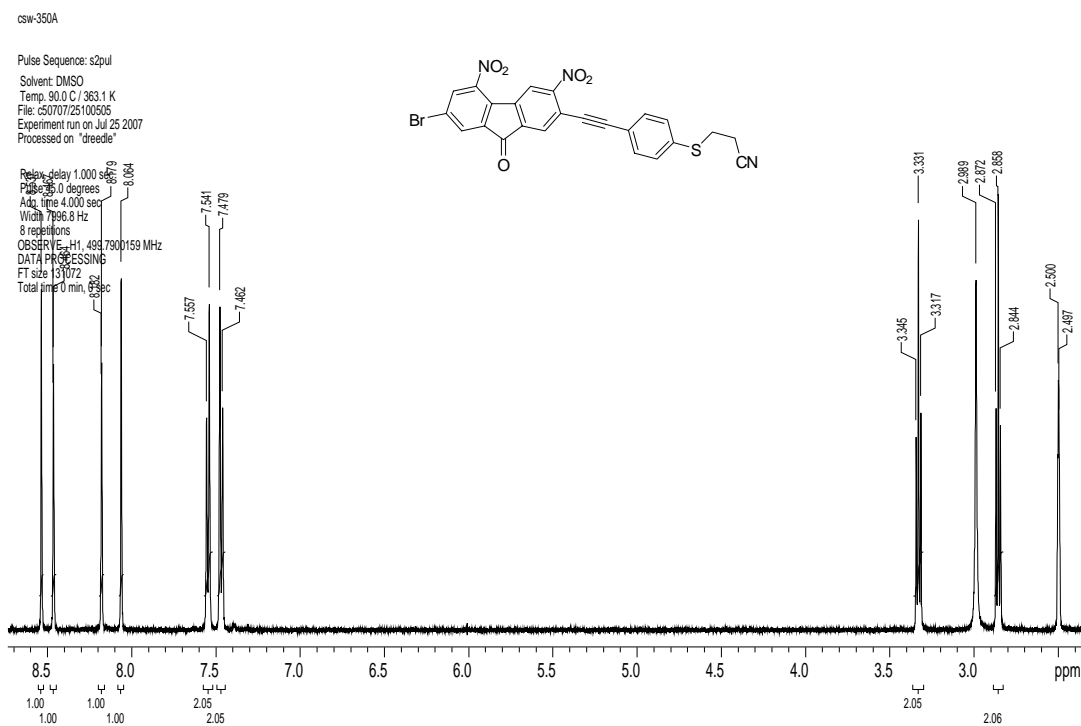

Compound **9**.  $^{13}\text{C}$  NMR (125 MHz, DMSO- $d_6$ , 363K)

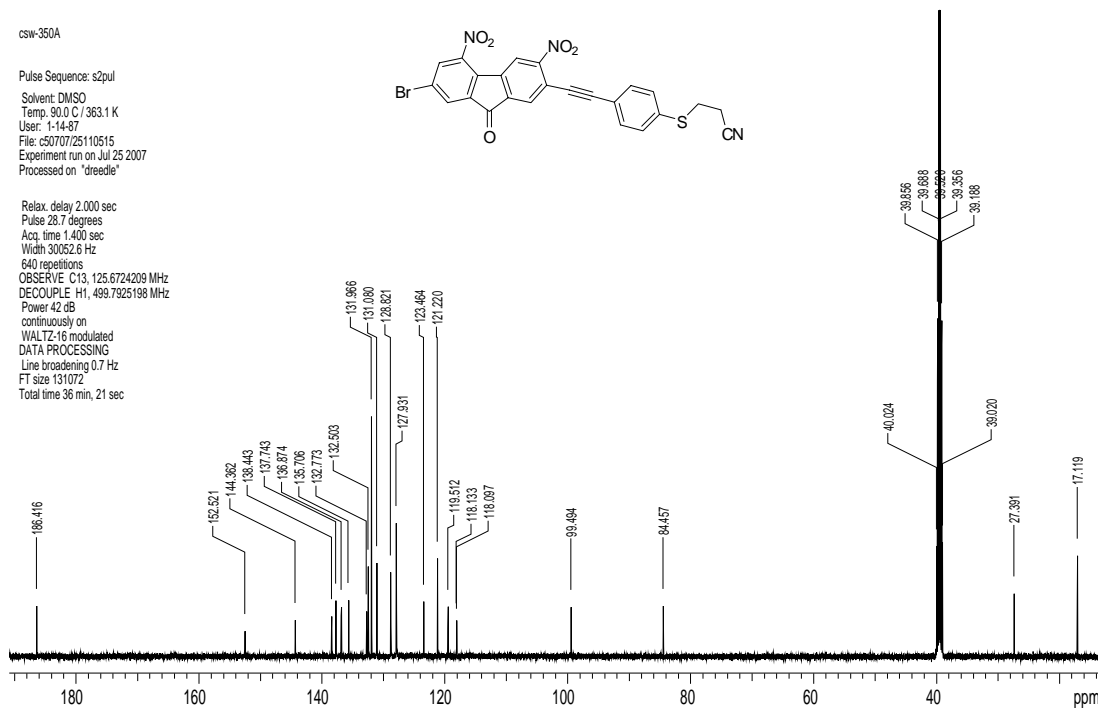

# Compound **10**. $^1\text{H}$ NMR (400 MHz, $\text{CDCl}_3$ )

Bruker data converted from file /data/tempdat/03180221/10  
xz158

Pulse Sequence: zg30  
Solvent:  $\text{cdcl}_3$   
Temp: 24.2 C / 297.3 K  
File: J03180221-10.cv  
Experiment run on 04-04-06  
Processed on "moodus"

Relax. delay 1.000 sec  
1st pulse 90.0 degrees  
2nd pulse 90.0 degrees  
Acq. time 7.899 sec  
Width 8276.1 Hz  
16 repetitions  
OBSERVE OFF, 400.1300146 MHz  
DATA PROCESSING  
FT size 65536

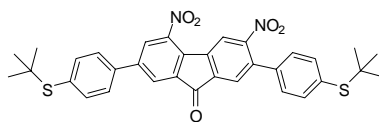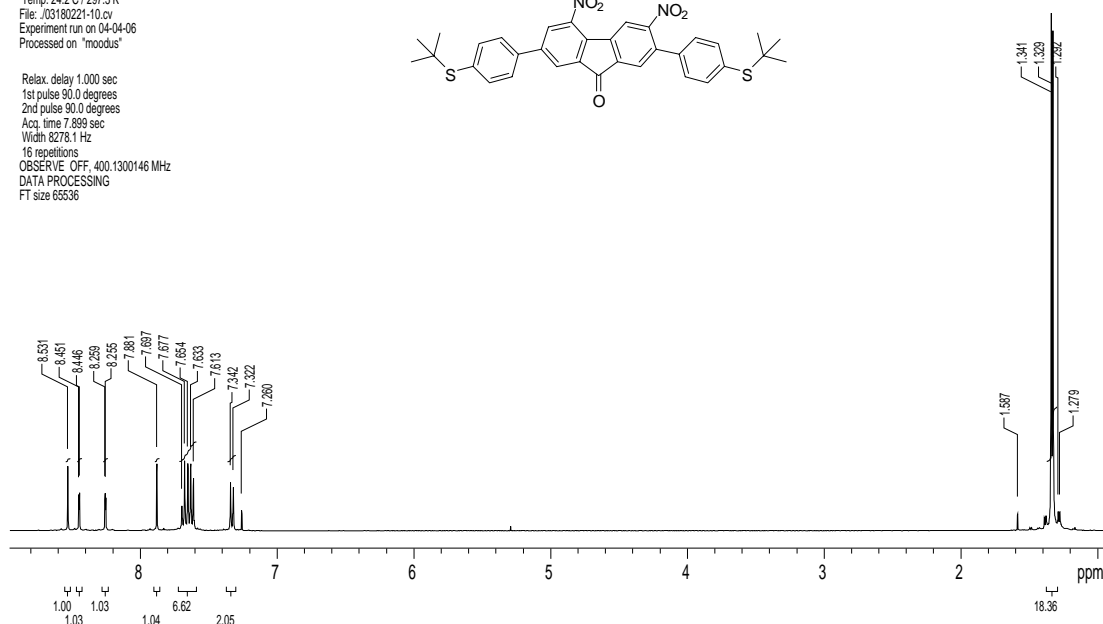

# Compound **10**. $^{13}\text{C}$ NMR (100 MHz, $\text{CDCl}_3$ )

Bruker data converted from file /data/tempdat/03180221/11  
xz158

Pulse Sequence: zgpg30  
Solvent:  $\text{cdcl}_3$   
Temp: 26.2 C / 299.3 K  
File: J03180221-11.cv  
Experiment run on 04-04-06  
Processed on "moodus"

Relax. delay 2.000 sec  
1st pulse 90.0 degrees  
2nd pulse 90.0 degrees  
Acq. time 2.728 sec  
Width 23980.8 Hz  
1024 repetitions  
OBSERVE OFF, 100.6127760 MHz  
DATA PROCESSING  
FT size 65536

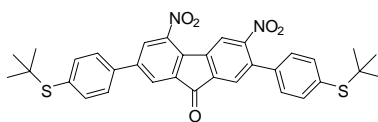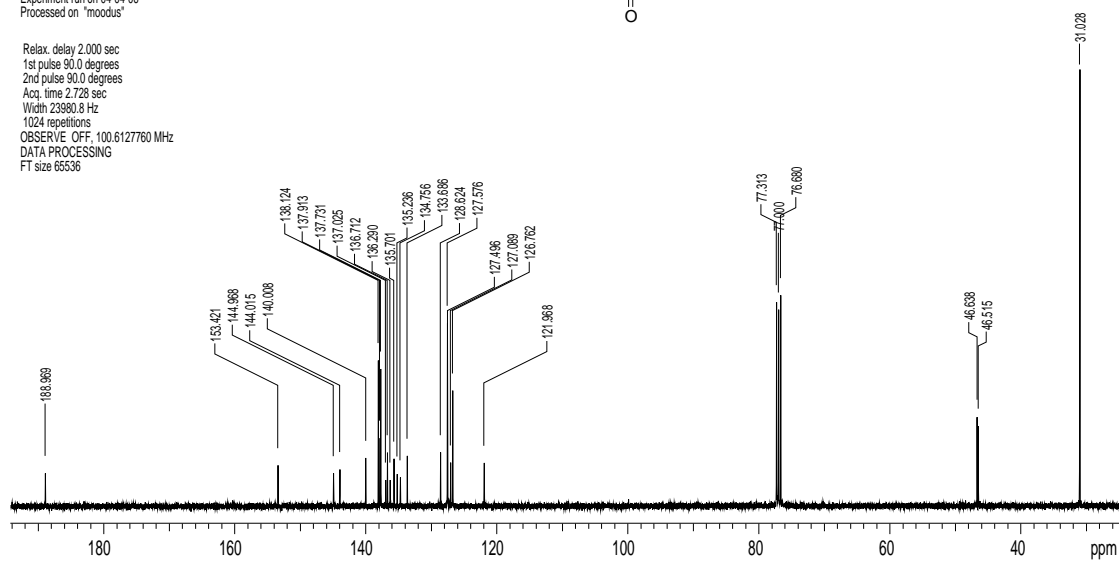

# Compound 11. <sup>1</sup>H NMR (400 MHz, CDCl<sub>3</sub>)

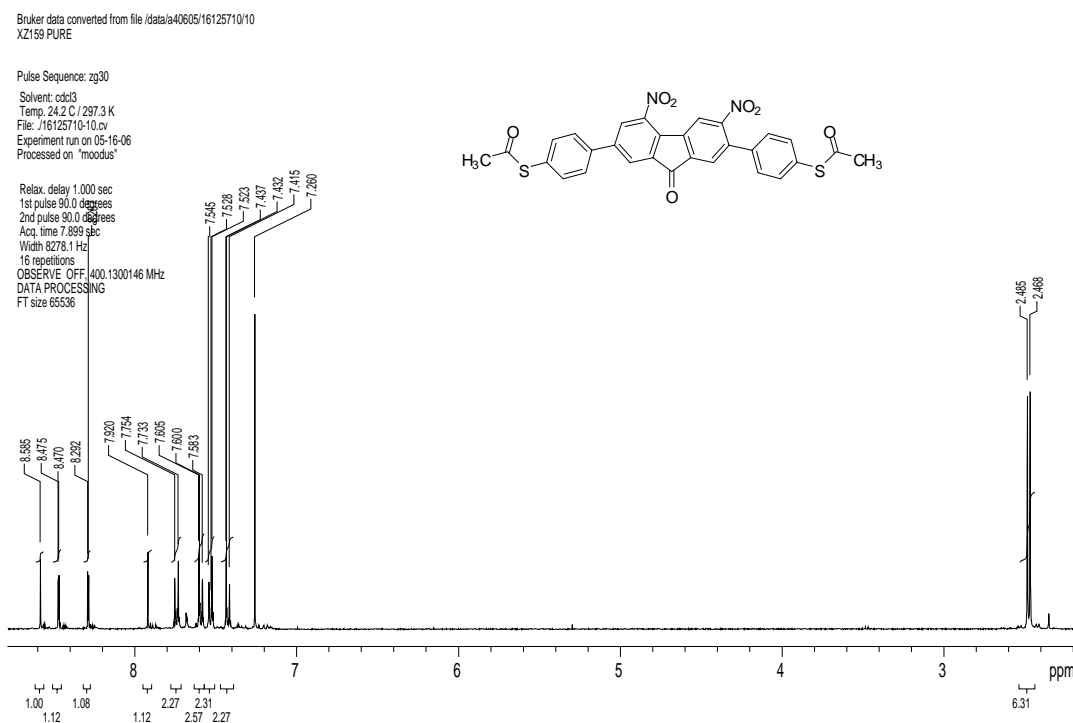

# Compound 11. <sup>13</sup>C NMR (100 MHz, CDCl<sub>3</sub>)

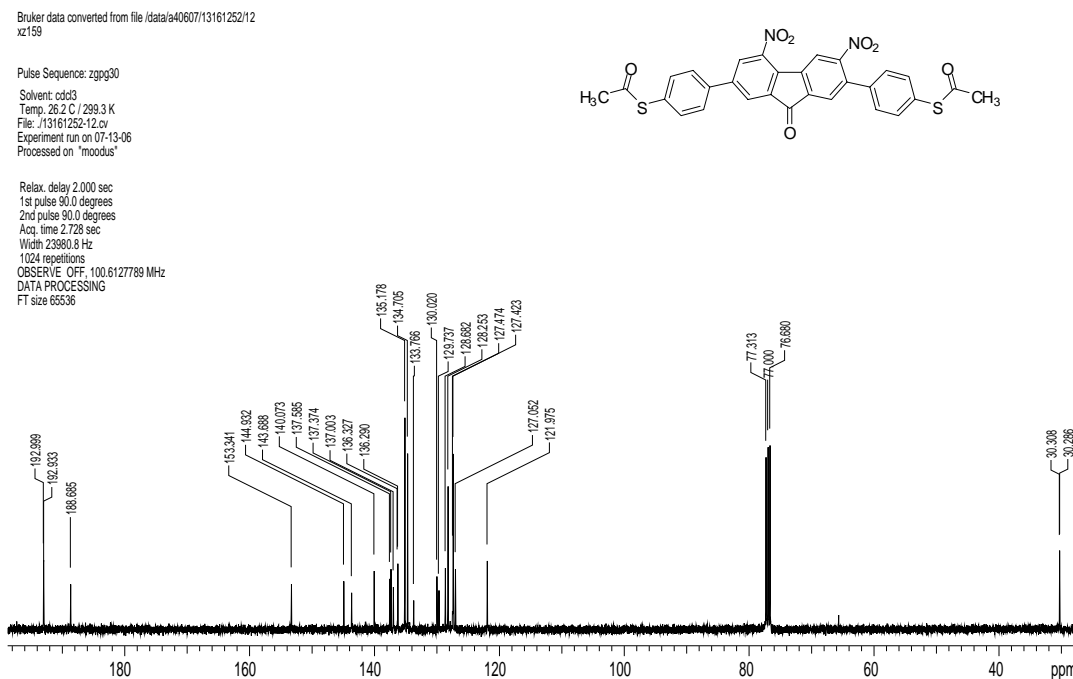

Compound **12**.  $^{13}\text{C}$  NMR (100 MHz,  $\text{CDCl}_3$ )

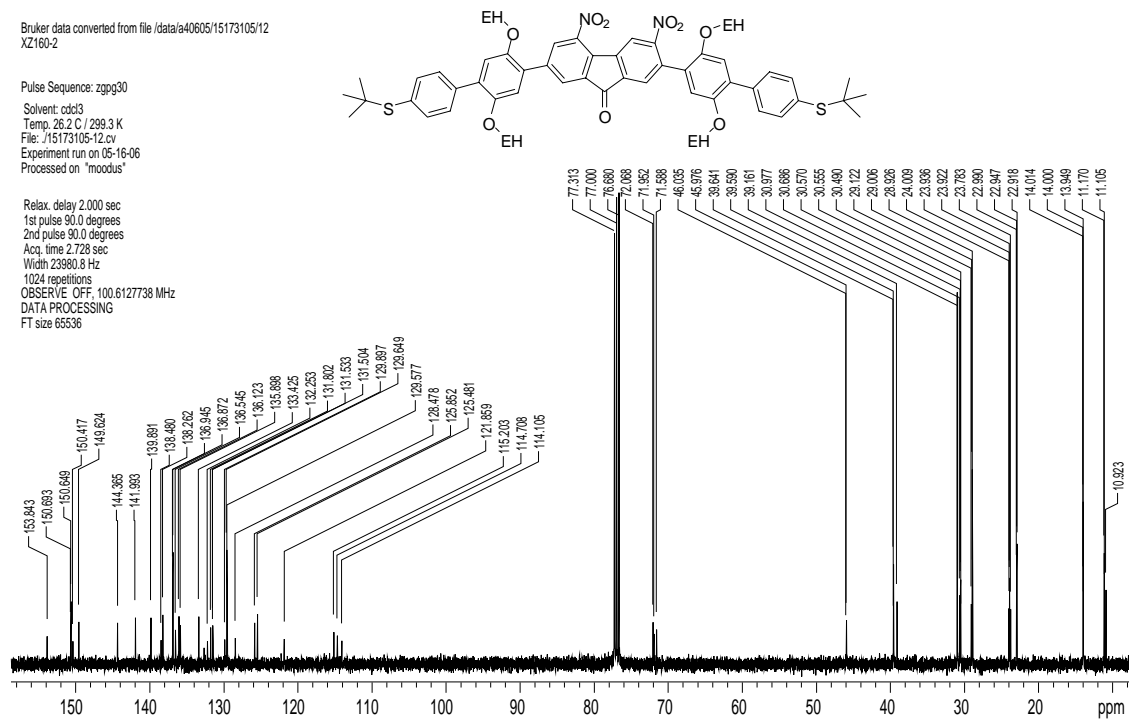

Compound **14**.  $^1\text{H}$  NMR (400 MHz,  $\text{CDCl}_3$ )

Bruker data converted from file /data/a40607/13161319/13  
xz155

Pulse Sequence: zg30  
Solvent:  $\text{cdcl}_3$   
Temp: 26.2 C / 299.3 K  
File: /13161319-13.cv  
Experiment run on 07-13-06  
Processed on "moodus"

Relax. delay 1.000 sec  
1st pulse 90.0 degrees  
2nd pulse 90.0 degrees  
Acq. time 7.899 sec  
Width 8278.1 Hz  
16 repetitions  
OBSERVE OFF: 400.1300146 MHz  
DATA PROCESSING  
FT size 65536

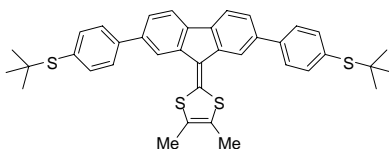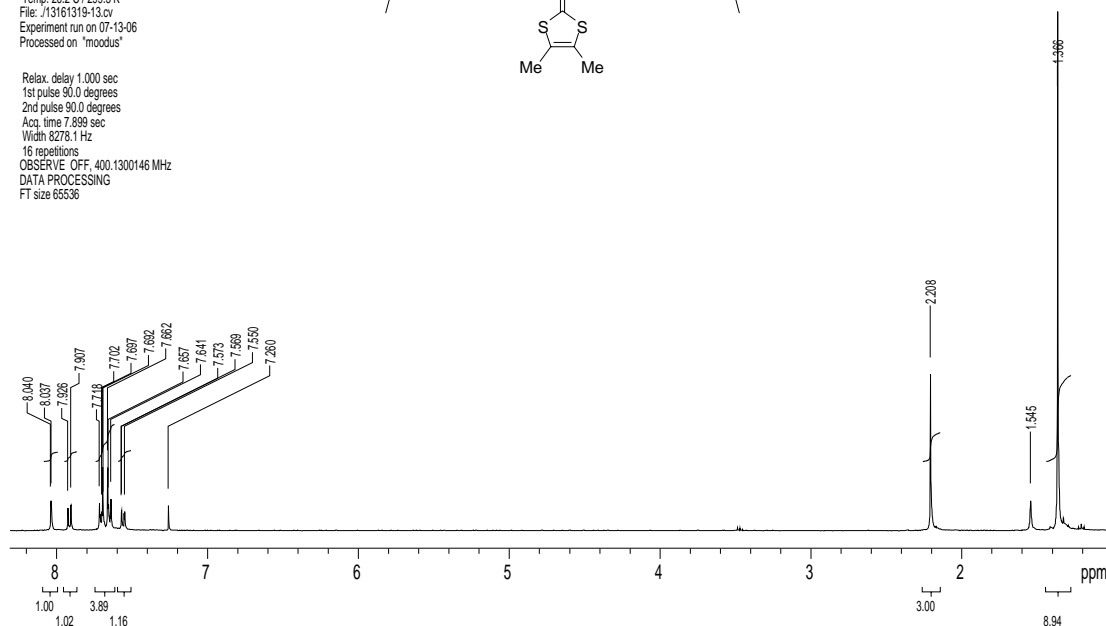

Compound **14**.  $^{13}\text{C}$  NMR (100 MHz,  $\text{CDCl}_3$ )

Bruker data converted from file /data/a40607/13161319/12  
xz155

Pulse Sequence: zgpg30  
Solvent:  $\text{cdcl}_3$   
Temp: 26.2 C / 299.3 K  
File: /13161319-12.cv  
Experiment run on 07-13-06  
Processed on "moodus"

Relax. delay 2.000 sec  
1st pulse 90.0 degrees  
2nd pulse 90.0 degrees  
Acq. time 2.728 sec  
Width 23980.8 Hz  
1024 repetitions  
OBSERVE OFF: 100.6127716 MHz  
DATA PROCESSING  
FT size 65536

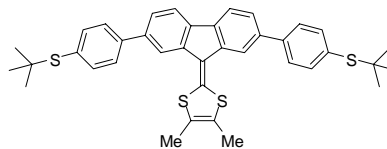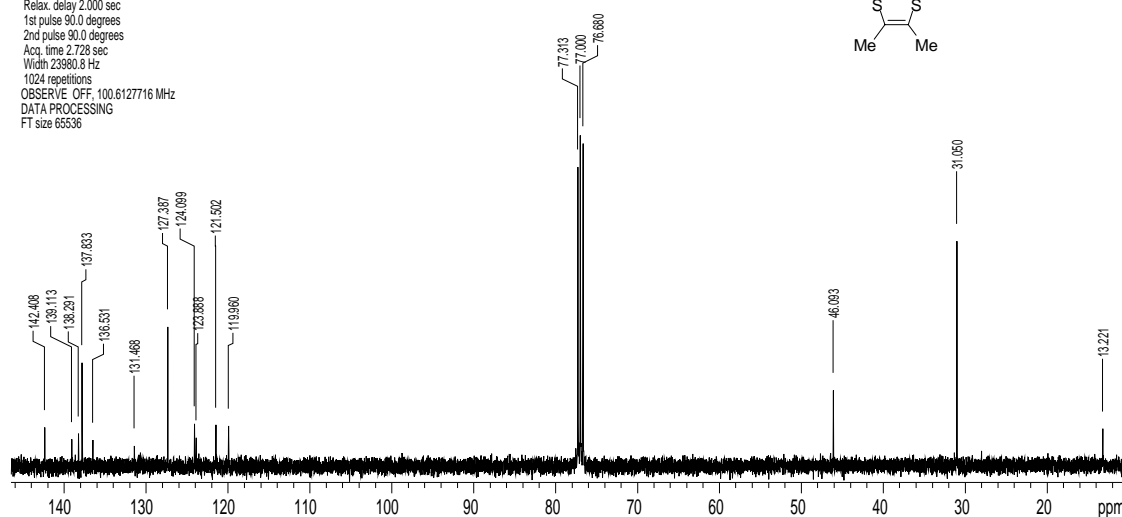

Compound **15**.  $^1\text{H}$  NMR (400 MHz,  $\text{CDCl}_3$ )

Bruker data converted from file /data/tempdat/31174745/10  
xz157

Pulse Sequence: zg30

Solvent:  $\text{cdcl}_3$

Temp. 24.2 C / 297.3 K

File: /31174745-10.cv

Experiment run on 03-31-06

Processed on "moodus"

Relax. delay 1.000 sec  
1st pulse 90.0 degrees  
2nd pulse 90.0 degrees  
Acq. time 7.899 sec  
Width 8278.1 Hz  
16 repetitions  
OBSERVE OFF 400.1300146 MHz  
DATA PROCESSING  
FT size 65536

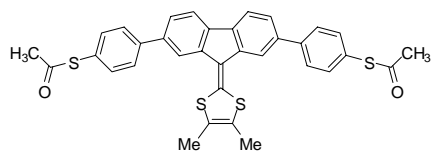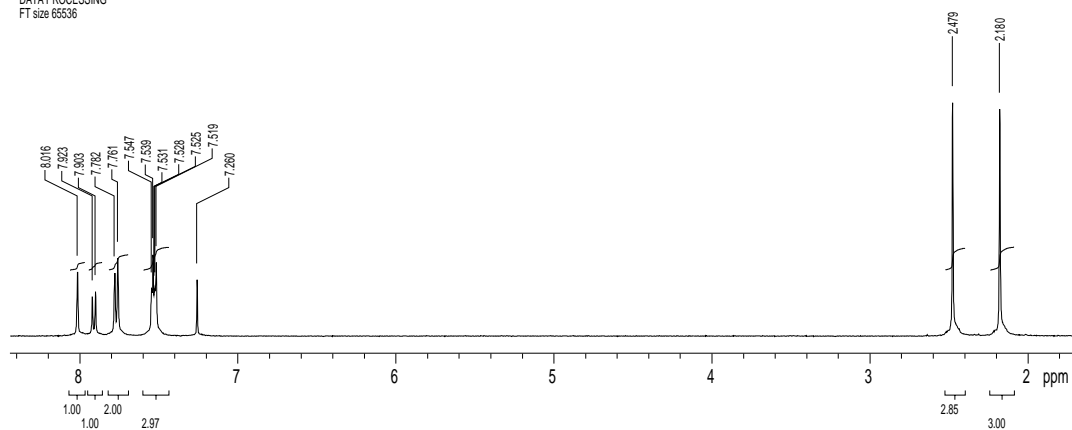

Compound **15**.  $^{13}\text{C}$  NMR (100 MHz,  $\text{CDCl}_3$ )

Bruker data converted from file /data/tempdat/31174745/11  
xz157

Pulse Sequence: zgpg30

Solvent:  $\text{cdcl}_3$

Temp. 26.2 C / 299.3 K

File: /31174745-11.cv

Experiment run on 03-31-06

Processed on "moodus"

Relax. delay 2.000 sec  
1st pulse 90.0 degrees  
2nd pulse 90.0 degrees  
Acq. time 2.728 sec  
Width 23980.8 Hz  
1024 repetitions  
OBSERVE OFF 100.6127730 MHz  
DATA PROCESSING  
FT size 65536

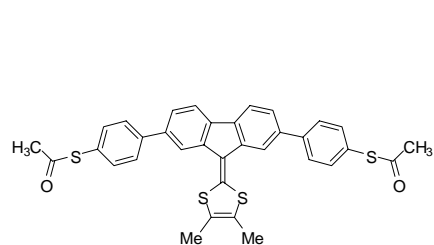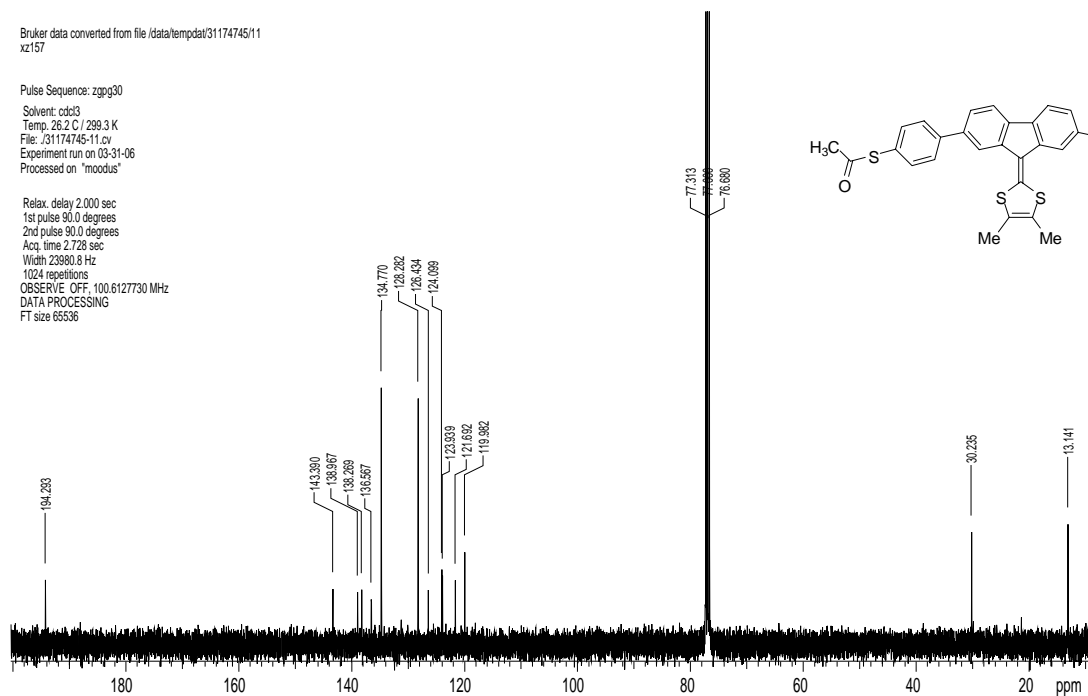



# Compound **16**. $^1\text{H}$ NMR (400 MHz, $\text{CDCl}_3$ )

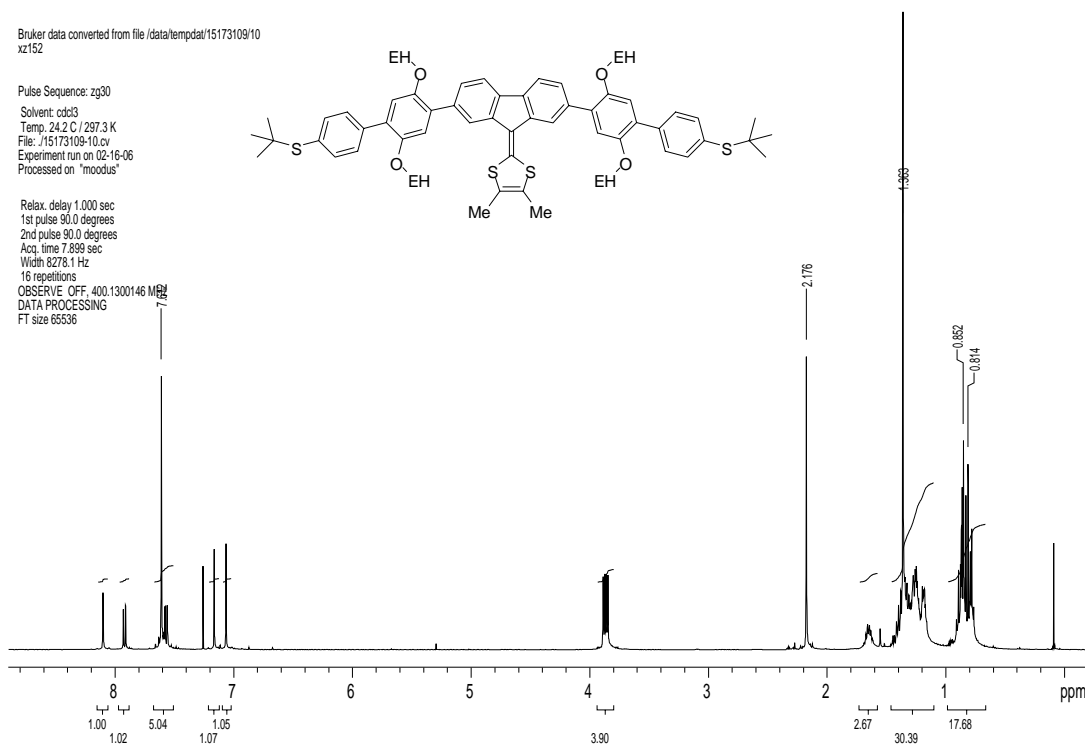

# Compound **16**. $^{13}\text{C}$ NMR (100 MHz, $\text{CDCl}_3$ )

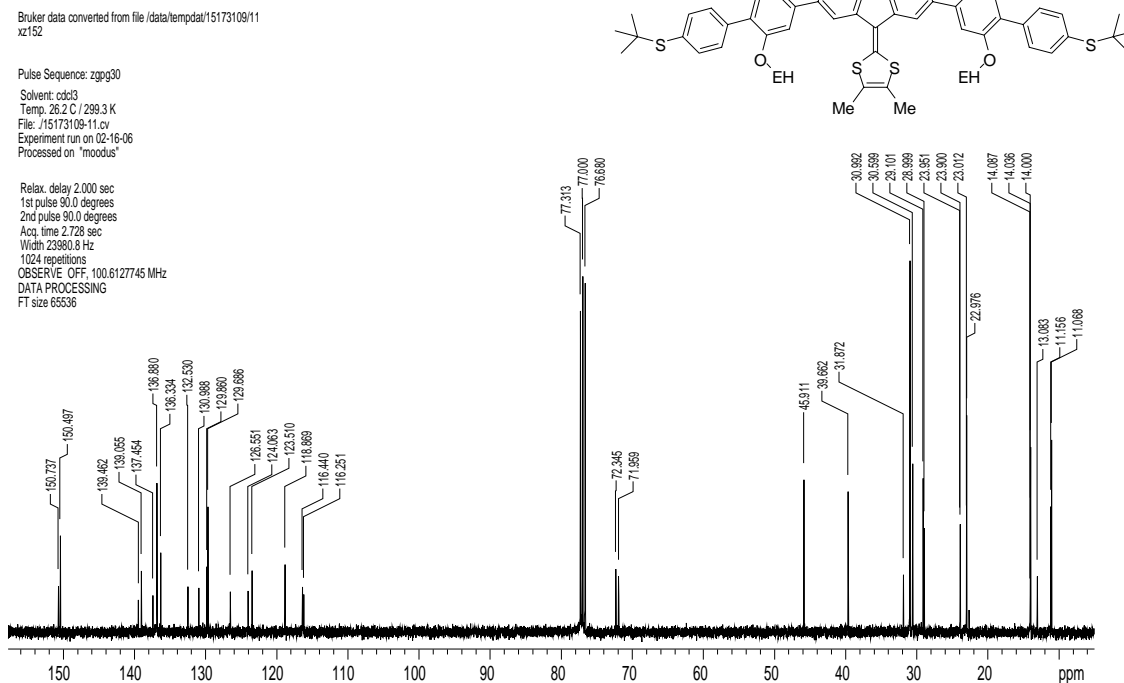

Compound **17**.  $^1\text{H}$  NMR (400 MHz, DMSO- $d_6$ )

Bruker data converted from file /data/a40608/03130616/10  
xz188

Pulse Sequence: zg30  
Solvent: dms0  
Temp: 25.2 C / 298.3 K  
File: \_03130616-10.cv  
Experiment run on 08-03-06  
Processed on "moodus"

Relax: delay 1.000 sec  
1st pulse 90.0 degrees  
2nd pulse 90.0 degrees  
Acq: time 7.899 sec  
Width 8278.1 Hz  
16 repetitions  
OBSERVE OFF, 400.1298961 MHz  
DATA PROCESSING  
FT size 65536

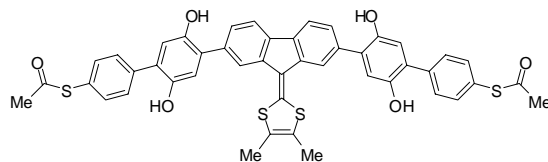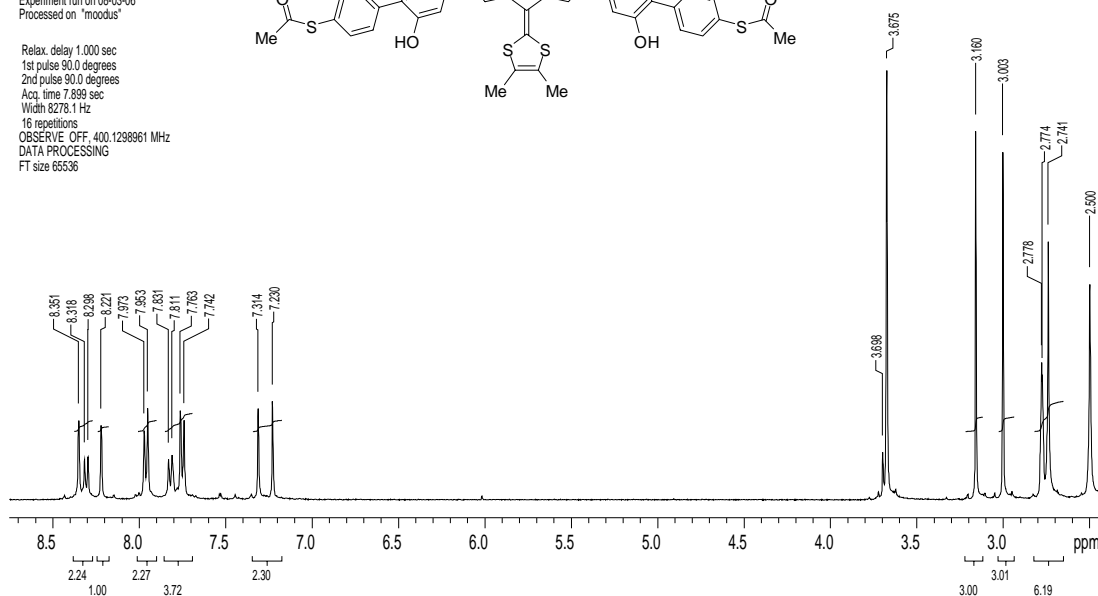

Compound **17**.  $^{13}\text{C}$  NMR (100 MHz, DMSO- $d_6$ )

Bruker data converted from file /data/a40608/03130616/12  
xz188

Pulse Sequence: zgpg30  
Solvent: dms0  
Temp: 27.2 C / 300.3 K  
File: \_03130616-12.cv  
Experiment run on 08-03-06  
Processed on "moodus"

Relax: delay 2.000 sec  
1st pulse 90.0 degrees  
2nd pulse 90.0 degrees  
Acq: time 2.728 sec  
Width 23980.8 Hz  
1024 repetitions  
OBSERVE OFF, 100.6128152 MHz  
DATA PROCESSING  
FT size 65536

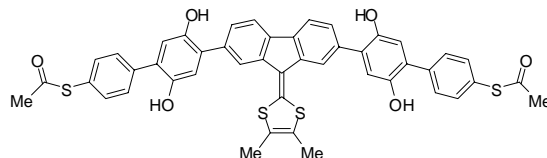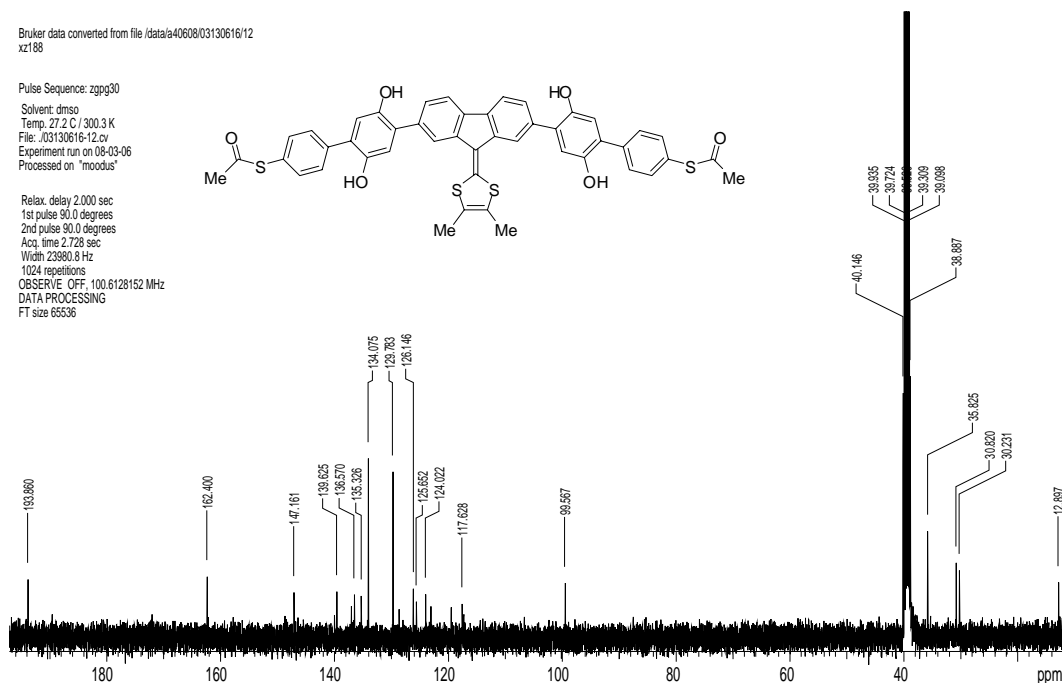

## References for the Supporting Information.

---

(1) Wang, C.; Bryce, M. R.; Gigon, J.; Ashwell, G. J.; Grace, I.; Lambert, C. J. *J. Org. Chem.* **2008**, *73*, 4810-4818.
